# Supplementary material for: Nano-engineered design and manufacturing of high-performance epoxy matrix composites with carbon fiber/selectively integrated graphene as multi-scale reinforcements
Source: Royal Society of Chemistry journal article supplement (doi:10.1039/c5ra23665g), 2016-01-01
Supplement: c5ra23665g1.pdf [file c5ra23665g1.pdf]

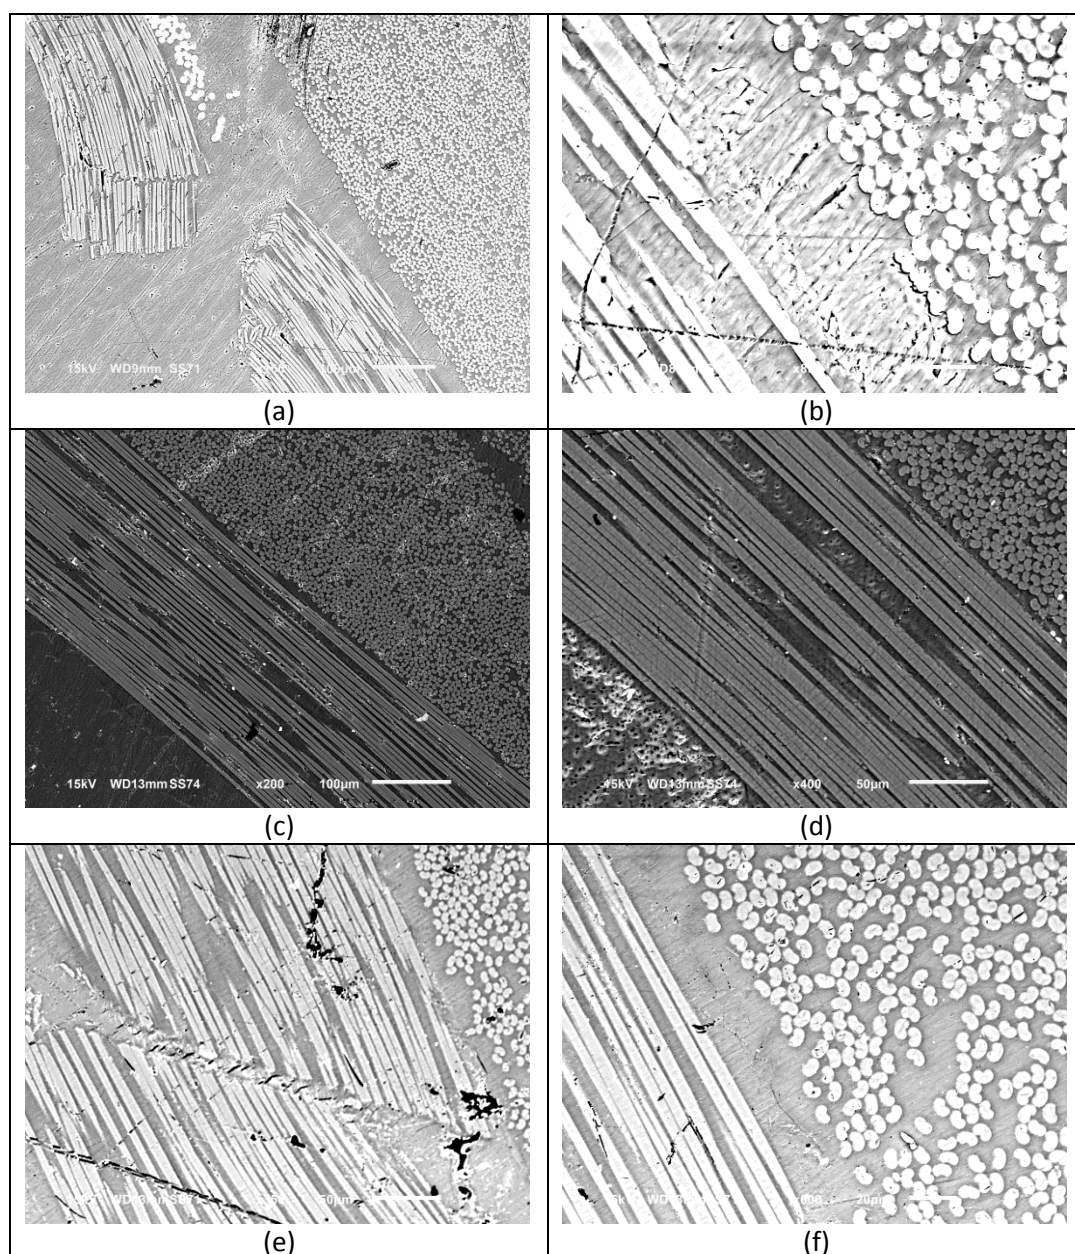

Fig S1. SEM images of cross-sectional area of specimens after flexural failure (a, b) CFRP, (c) CFRP/INT, (d) CFRP/MTX, and (e, f) CFRP/INT+MTX.
